# Supplementary material for: Ten-year Durability, Hemodynamic Performance, and Clinical Outcomes after Transcatheter Aortic Valve Implantation Using a Self-expanding Device
Source: Springer Nature journal article supplement (doi:10.1007/s40119-024-00369-2), 2024-05-12
Supplement: MOESM1 [file 27081858]

# **Ten-year Durability, Hemodynamic Performance, and Clinical Outcomes after Transcatheter Aortic Valve Implantation Using a Self-expanding Device**

Karim Elbasha<sup>1,2</sup>, MD; Jatinderjit Kaur<sup>1</sup>, MD; Mohammad Abdelghani<sup>3,4,5</sup>, MD, PhD; Martin Landt<sup>1</sup>, MD; Sultan Alotaibi<sup>1,6</sup>, MD; Ahmed Abdelaziz<sup>3</sup>, MD; Mohamed Abdel-Wahab<sup>7</sup>, MD; Ralph Toelg<sup>1</sup>, MD; Volker Geist<sup>1</sup>, MD; Gert Richardt<sup>1</sup>, MD and Abdelhakim Allali<sup>1,8</sup>, MD.

- 1) Cardiology Department, Heart Centre Segeberger Kliniken GmbH, Bad Segeberg, Germany
- 2) Cardiology Department, Zagazig University, Sharkia, Egypt
- 3) Department of Cardiology, Al-Azhar University, Cairo, Egypt
- 4) Cardiology Unit, Department of Internal Medicine, Sohar Hospital, Oman
- 5) Department of Cardiology, Amsterdam UMC, Amsterdam, The Netherlands
- 6) Cardiac Centre, King Fahad Armed Forces Hospital, Jeddah, Saudi Arabia
- 7) Cardiology Department, Heart Centre Leipzig at the University of Leipzig, Leipzig, Germany
- 8) University Heart Centre Lübeck, Medical Clinic II, Lübeck, Germany.

## **Corresponding Author**

Karim Elbasha, MD

drkarim.elbasha@gmail.com

Heart Centre Segeberger Kliniken GmbH

Am Kurpak 1, 23795 Bad Segeberg, Germany

Tel: +4945518029763 / Fax: +4945518024805

**Running title:** Long-term durability and performance of self-expanding THV

**Supplementary Figure 1. 30 days complications among different time intervals.**

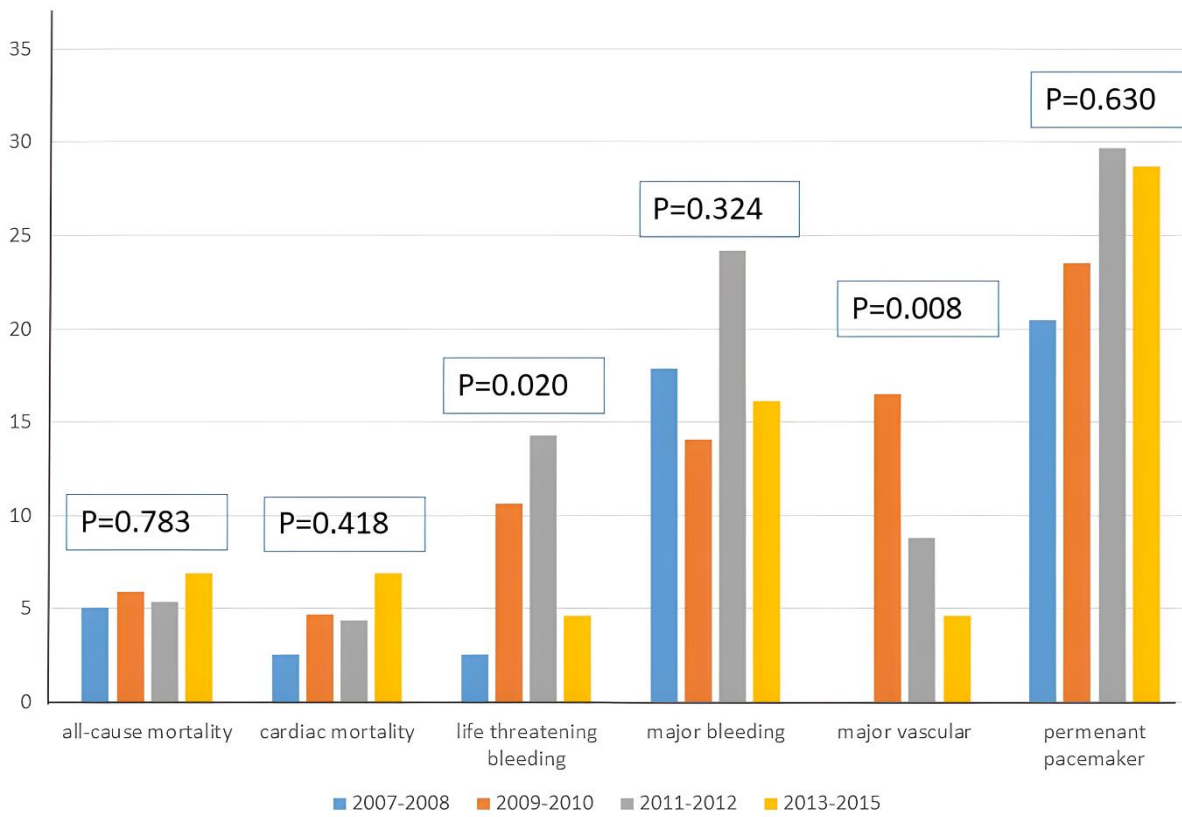

Columnar time series bar chart showed the rates of 30 days complications from 2007 to 2015 divided into different time intervals.

## Supplementary Figure 2. All-cause and cardiovascular mortality

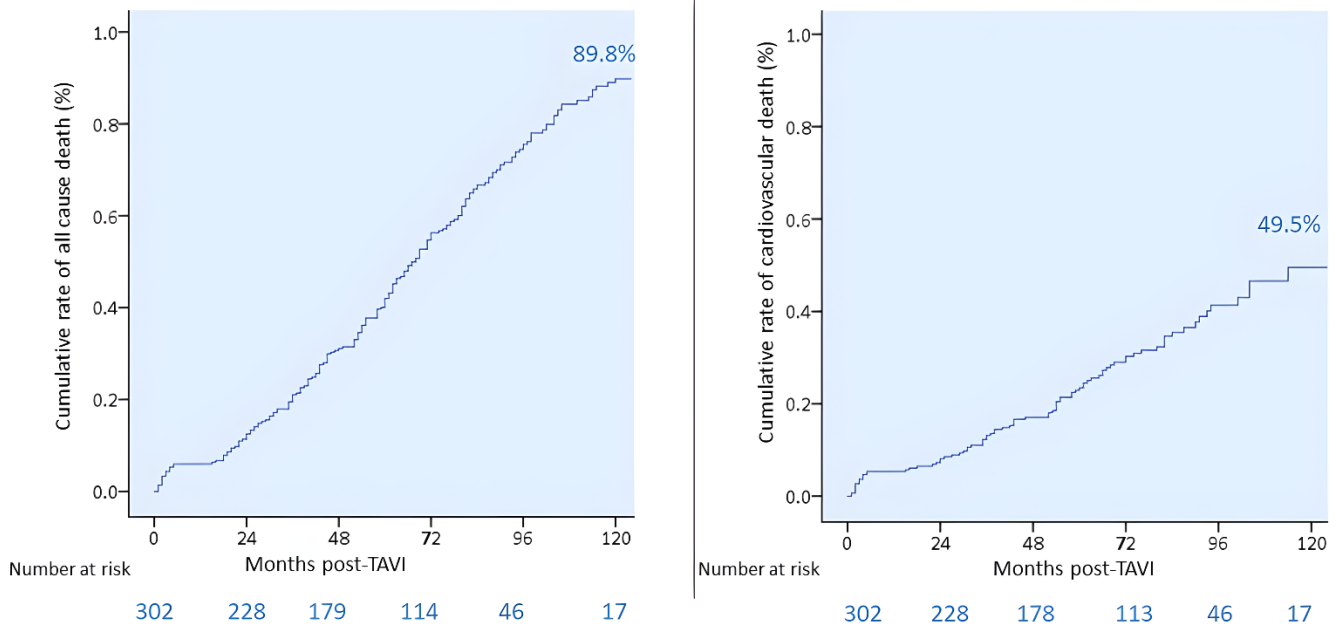

Kaplan-Meier curves that shows time to all-cause (a) and cardiovascular mortality (b). TAVI, transcatheter aortic valve implantation.

### Supplementary Figure 3. Aortic insufficiency at follow-up

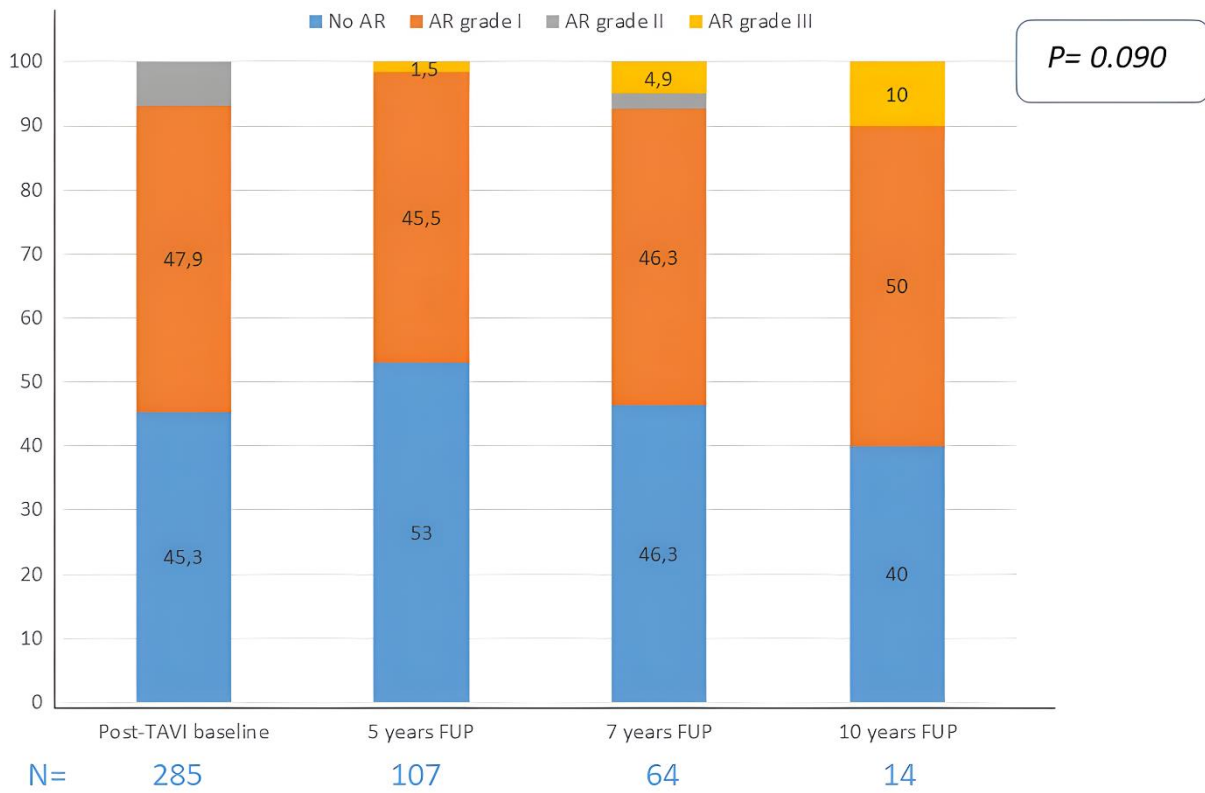

Bar chart demonstrates different aortic regurgitation grade post-procedural and at 10-years follow-up. AR, aortic regurgitation; FUP, follow-up; TAVI, transcatheter aortic valve implantation.

## Supplementary Figure 4. Summary of the main finding

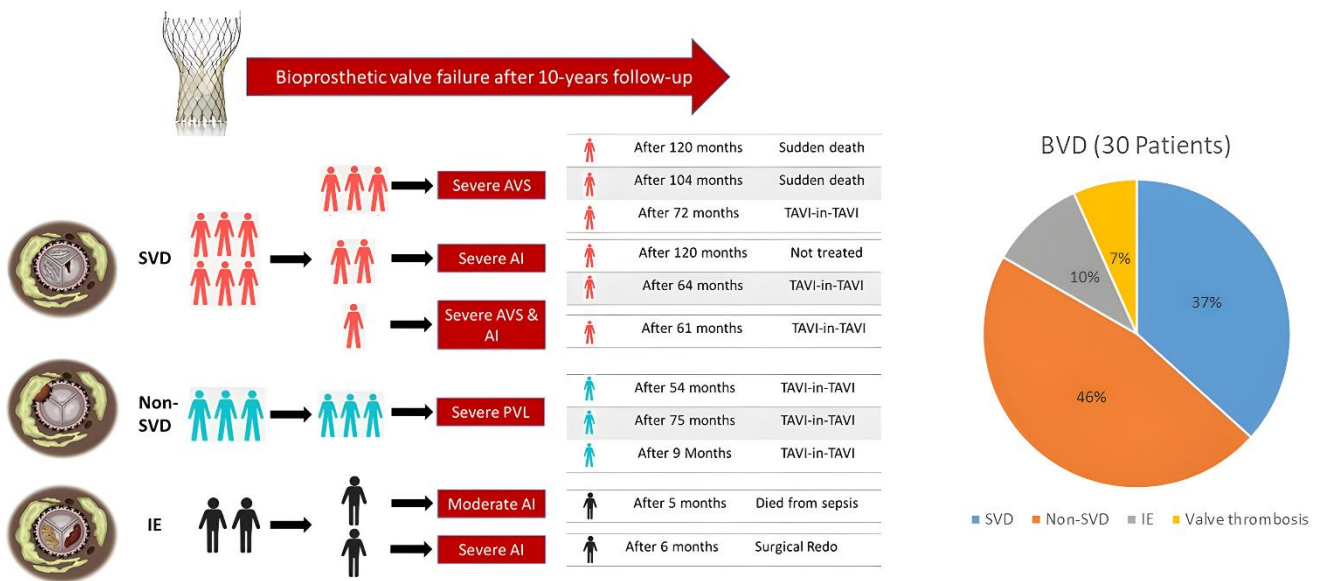

Diagram illustrates the different types and timing of bioprosthetic valve dysfunction. AI, aortic insufficiency; AVS, aortic valve stenosis; BVD, bioprosthetic valve dysfunction; IE, infective endocarditis; SVD, structural valve deterioration.

**Supplementary table 1. Predictors of all-cause mortality**

| <b>Variable</b>           | <b>HR ; 95% CI</b> | <b>p-value</b> | <b>HR ; 95% CI</b> | <b>p-value</b> |
|---------------------------|--------------------|----------------|--------------------|----------------|
| <b>Age</b>                | 1.02 (0.99-1.04)   | 0.209          |                    |                |
| <b>MVD</b>                | 0.97 (0.87-1.09)   | 0.629          |                    |                |
| <b>Baseline AVA</b>       | 0.79 (0.48-1.29)   | 0.353          |                    |                |
| <b>Baseline Peak PG</b>   | 1.11 (0.99-1.00)   | 0.090          | 0.99 (0.99-1.00)   | 0.427          |
| <b>Baseline Pro BNP</b>   | 1.42 (1.06-1.89)   | 0.018          | 1.19 (0.77-1.87)   | 0.424          |
| <b>Reduced LV EF</b>      | 1.41(0.98-2.02)    | 0.067          | 1.51 (0.99-2.28)   | 0.053          |
| <b>AR&gt;II post-TAVI</b> | 1.27 (0.91-1.76)   | 0.161          |                    |                |
| <b>AKI</b>                | 2.06 (1.47-2.89)   | <0.001         | 2.55 (1.48-4.41)   | <b>0.001</b>   |
| <b>PPM</b>                | 0.85 (0.62-1.16)   | 0.308          |                    |                |
| <b>SVD</b>                | 3.02 (1.12-8.15)   | 0.029          | 3.80 (0.52-27.75)  | 0.188          |

AKI, acute kidney injury; AR, Aortic regurgitation; AVA, aortic valve area; LV EF, left ventricular ejection fraction; MVD, multi-vessel disease; PG, pressure gradient; PPM, permanent pace maker; SVD, structural valve deterioration.
